# Supplementary material
Source: publisher figshare collection journal article supplement (https://springernature.figshare.com/ndownloader/files/13022177)
Supplement: Supplementary file [file 13022177]

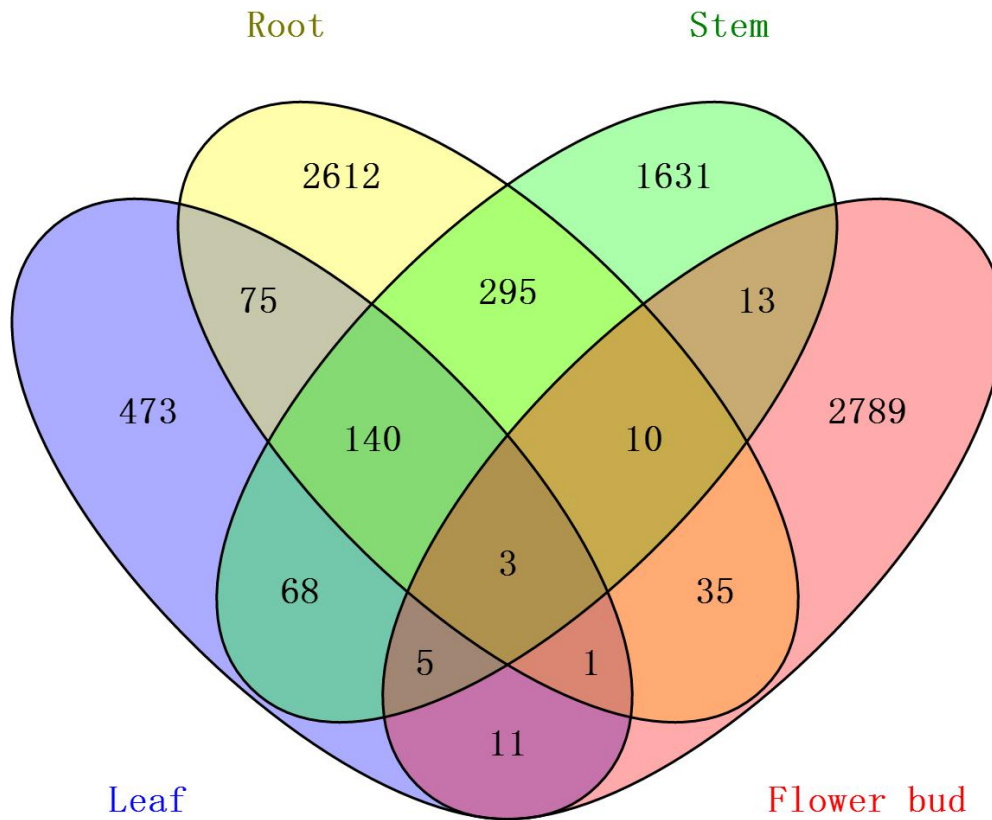

**Figure S1 Venn diagram shows the number of tissue-preferentially expressed circRNAs in different tissues of soybean.**  
The circRNAs in stems, roots and leaves of soybean were identified by Zhao et al., and the circRNAs in flower buds were identified in this study.
